# Supplementary material
Source: PubMed Central journal article supplement (PMC3846436)
Supplement: NIHMS478284-supplement-Figure_1.pdf [file NIHMS478284-supplement-Figure_1.pdf]

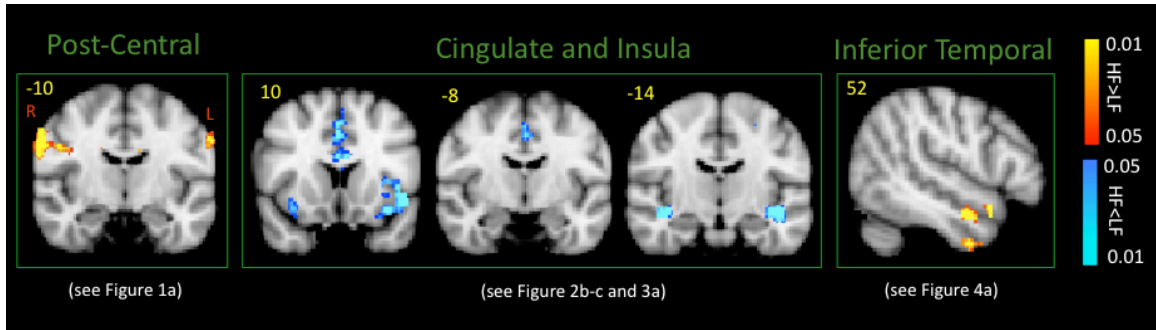

**Supplementary Figure 1: Functional Contrast in LF vs. HF without Flipping the Brain.** Differences in the activation in response to noxious (pain threshold+1oC) in HF vs. LF patients as determined without flipping the brain along the y-axis (anterior–posterior axis) before being registered to the standard brain (The flipping was originally performed to determine which regions were modulated relative to the side of stimulation.) The difference patterns were similar with or without flipping the brains (see the discussion).
